# Supplementary material
Source: Royal Society of Chemistry journal article supplement (doi:10.1039/d6nr01096b)
Supplement: d6nr01096b1.pdf [file d6nr01096b1.pdf]

## Supplementary Information

### High-performance $\text{LiMn}_{1-x}\text{Fe}_x\text{PO}_4/\text{C}$ cathode constructed by nano-sized spherical $\text{MnFePO}_4\cdot\text{H}_2\text{O}$ precursor via scalable reverse-titration co-precipitation strategy

Hongwei Yang<sup>a</sup>, Liuquan Hu<sup>b</sup>, Zhuang Hu<sup>a</sup>, Wentian Yi<sup>a</sup>, Zhe Mu<sup>a</sup>, Jie Wu<sup>a</sup>, Zewei Xie<sup>c</sup>, Changling Fan<sup>a,d,\*</sup>

<sup>a</sup> College of Materials Science and Engineering, Hunan University, Changsha, Hunan, 410082, China

<sup>b</sup> Minmetals New Energy Materials (Hunan) Co., Ltd., Changsha, Hunan, 410205, China

<sup>c</sup> Hunan Changyuan Lico New Energy Co., Ltd., Changsha, Hunan, 410205, China

<sup>d</sup> Hunan Province Key Laboratory for Advanced Carbon Materials and Applied Technology, Hunan University, Changsha, Hunan, 410082, China

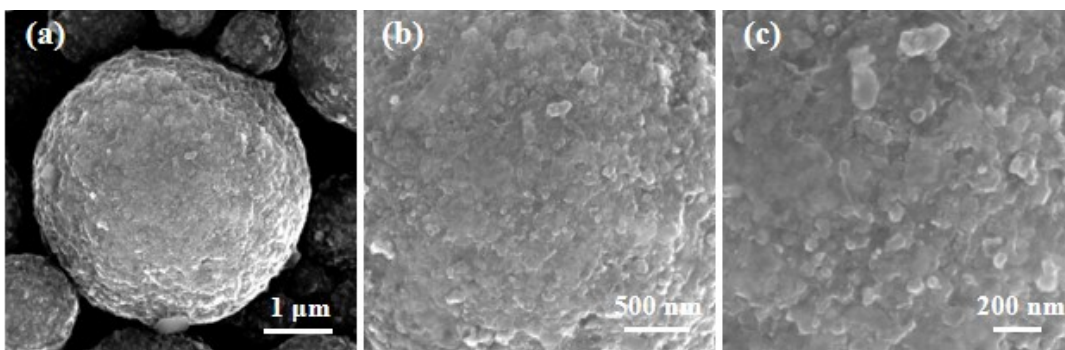

**Figure S1.** TEM image of the final L-SMSD material.

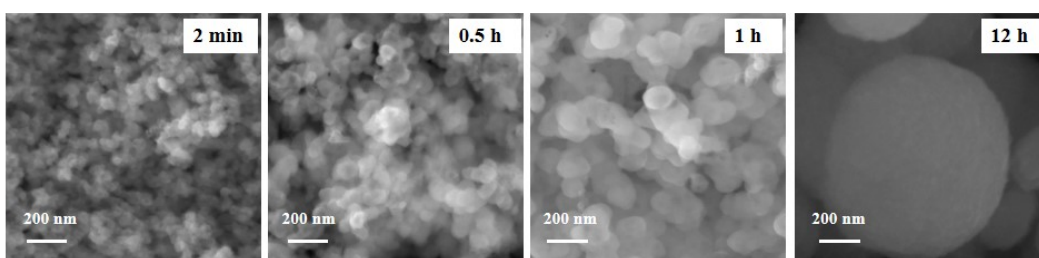

**Figure S2.** Time-resolved SEM images of  $\text{MnFePO}_4 \cdot \text{H}_2\text{O}$  precursor at different reaction stages:

(a) 2 min, (b) 0.5 h, (c) 1 h, and (d) 12 h.

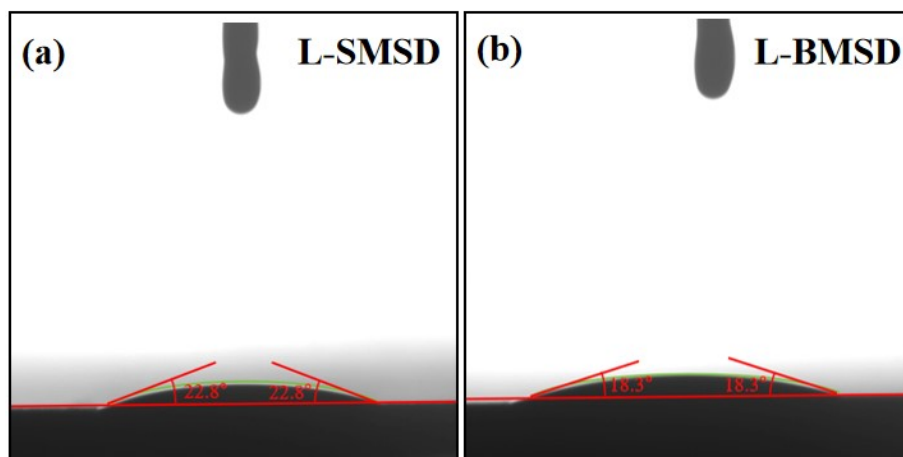

**Figure S3.** Contact angle optical images of electrolyte droplets on the surface of L-SMSD and

L-BMSD cathode.

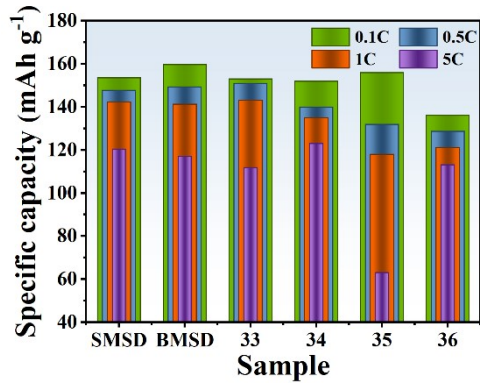

**Figure S4.** Comparison of half-cell rate capability with recently reported samples.

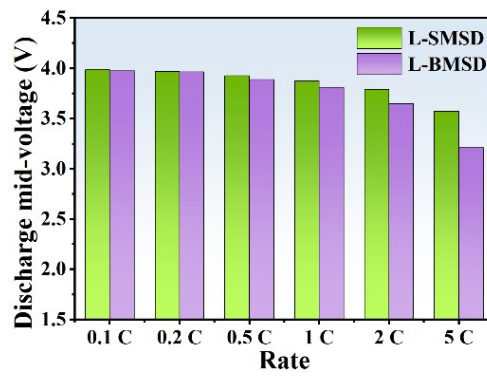

**Figure S5.** Comparison of half-cell discharge median voltage at different rates.

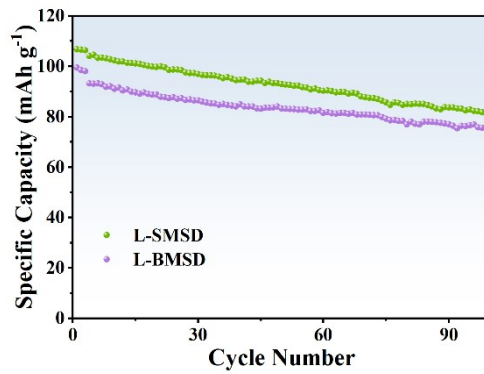

**Figure S6.** Cycling performance of graphite || LiMn<sub>1-x</sub>Fe<sub>x</sub>PO<sub>4</sub>/C full cells at 1C over 100 cycles.

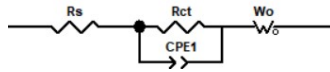

**Figure S7.** Equivalent circuit diagram for fitting the in-situ EIS data.

The components and their physical meanings are: (1) **Rs**: Ohmic resistance (electrolyte, current collector, cell connections). (2) **Rct // CPE1**: Charge transfer resistance and double-layer capacitance at the electrode/electrolyte interface. (3) **Wo**: Warburg impedance corresponding to solid-state  $\text{Li}^+$  diffusion within the cathode material.

**Table S1.** Lattice parameters of MnFePO<sub>4</sub>·H<sub>2</sub>O precursor.

| Samples                               | <i>a</i> (Å) | <i>b</i> (Å) | <i>c</i> (Å) | <i>V</i> (Å <sup>3</sup> ) |
|---------------------------------------|--------------|--------------|--------------|----------------------------|
| MnFePO <sub>4</sub> ·H <sub>2</sub> O | 6.892        | 7.496        | 7.379        | 350.7                      |
| Standard PDF<br>#97-006-2220          | 6.912        | 7.470        | 7.357        | 351.5                      |

**Table S2.** Rietveld refinement results of L-BMSD sample. (Rwp = 6.280%, GOF = 1.98)

| L-BMSD                | Atom | x            | y            | z            | Occ.                       |
|-----------------------|------|--------------|--------------|--------------|----------------------------|
| Atomic<br>Occupancies | Li1  | 0.00000      | 0.00000      | 0.00000      | 0.9642                     |
|                       | Fe2  | 0.00000      | 0.00000      | 0.00000      | 0.0358                     |
|                       | Fe1  | 0.28236      | 0.25000      | 0.97188      | 0.6442                     |
|                       | Mn1  | 0.28236      | 0.25000      | 0.97188      | 0.3200                     |
|                       | Li2  | 0.28236      | 0.25000      | 0.97188      | 0.0358                     |
|                       | P1   | 0.09320      | 0.25000      | 0.40738      | 1.0000                     |
|                       | O1   | 0.09671      | 0.25000      | 0.73874      | 1.0000                     |
|                       | O2   | 0.45480      | 0.25000      | 0.20355      | 1.0000                     |
|                       | O3   | 0.16130      | 0.04700      | 0.28200      | 1.0000                     |
| Lattice Parameters    |      | <i>a</i> (Å) | <i>b</i> (Å) | <i>c</i> (Å) | <i>V</i> (Å <sup>3</sup> ) |
|                       |      | 10.40394     | 6.06834      | 4.72619      | 298.386                    |

**Table S3.** Rietveld refinement results of L-SMSD sample. (Rwp = 6.295%, GOF = 2.14)

| L-SMSD             | Atom | x        | y       | z       | Occ.                  |
|--------------------|------|----------|---------|---------|-----------------------|
|                    | Li1  | 0.00000  | 0.00000 | 0.00000 | 0.9688                |
|                    | Fe2  | 0.00000  | 0.00000 | 0.00000 | 0.0312                |
|                    | Fe1  | 0.28333  | 0.25000 | 0.97040 | 0.6488                |
|                    | Mn1  | 0.28333  | 0.25000 | 0.97040 | 0.3200                |
| Atomic             | Li2  | 0.28333  | 0.25000 | 0.97040 | 0.0312                |
| Occupancies        | P1   | 0.09343  | 0.25000 | 0.41226 | 1.0000                |
|                    | O1   | 0.09697  | 0.25000 | 0.74311 | 1.0000                |
|                    | O2   | 0.45185  | 0.25000 | 0.19486 | 1.0000                |
|                    | O3   | 0.16336  | 0.04761 | 0.29312 | 1.0000                |
|                    |      | $a$ (Å)  | $b$ (Å) | $c$ (Å) | $V$ (Å <sup>3</sup> ) |
| Lattice Parameters |      | 10.39565 | 6.06425 | 4.72303 | 297.749               |

**Table S4.** Comparison of process efficiency and electrochemical performance between the present work and three reported references.

| Comparison aspect                        | Ref.38                 | Ref.39                 | Ref.40                                                     | SMSD in this work                                          |
|------------------------------------------|------------------------|------------------------|------------------------------------------------------------|------------------------------------------------------------|
| Material system                          | LiFePO <sub>4</sub> /C | LiFePO <sub>4</sub> /C | LiFe <sub>0.25</sub> Mn <sub>0.75</sub> PO <sub>4</sub> /C | LiMn <sub>0.68</sub> Fe <sub>0.32</sub> PO <sub>4</sub> /C |
| Grinding method                          | Sand milling           | No milling             | Ball + Sand milling                                        | Sand milling                                               |
| Total grinding time                      | 6 h                    | none                   | 4 h (3 h+1 h)                                              | 0.5 h                                                      |
| Spray drying time                        | Not used               | 45 min                 | Not specified                                              | 15 min                                                     |
| Particle size                            | 200-800 nm             | 9 μm (D50)             | ~50 nm                                                     | 4.806 μm (D50)                                             |
| Specific capacity (mAh g <sup>-1</sup> ) | 150.3 (0.1C)           | 98.0 (0.1C)            | 148.4 (0.05C)                                              | 153.5 (0.1C)                                               |
| Cycling stability                        | 91.9% (200/1C)         | 59.7% (200/0.5C)       | 90.3% (100/1C)                                             | 95.2% (450/1C)                                             |

Note: For comparison, only carbon-coated samples are selected from each reference (excluding CNTs, graphene, or rGO modifications).

**TEXT. S1.** The rationale for the  $\text{KMnO}_4$  dosage is as follows.

The amount of  $\text{KMnO}_4$  was determined by considering its dual role as both the oxidant and an additional manganese source. In this system,  $\text{KMnO}_4$  oxidizes  $\text{Mn}^{2+}$  from  $\text{MnSO}_4$  and  $\text{Fe}^{2+}$  from  $\text{FeSO}_4$  to their trivalent states. During this process,  $\text{Mn}^{7+}$  in  $\text{MnO}_4^-$  is reduced. Under the strongly oxidizing conditions of the reaction medium ( $\text{pH} = 1.7\text{-}2.0$ ), the Mn species derived from  $\text{KMnO}_4$  is ultimately incorporated into the precursor as  $\text{Mn}^{3+}$ . Therefore, all manganese atoms, regardless of whether they originate from  $\text{MnSO}_4$  or  $\text{KMnO}_4$ , are incorporated into the final  $\text{MnFePO}_4 \cdot \text{H}_2\text{O}$  precursor lattice as  $\text{Mn}^{3+}$ .

The reaction can be summarized as:

**Step 1 (Oxidation):**

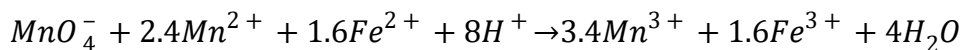

**Step 2 (Precipitation):**

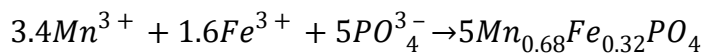

Accordingly, when the molar amount of  $\text{KMnO}_4$  is set to one quarter of the total amount of  $\text{MnSO}_4$  and  $\text{FeSO}_4$ , it provides not only sufficient oxidizing capacity for the conversion of  $\text{Mn}^{2+}/\text{Fe}^{2+}$  to  $\text{Mn}^{3+}/\text{Fe}^{3+}$ , but also the additional manganese necessary to achieve the final Mn:Fe ratio of 0.68:0.32 in the precursor.
